# Supplementary material
Source: Springer Nature journal article supplement (https://www.springermedizin.de/resource/supplementary/12879_2009_1210_MOESM1_ESM.pdf/9442096)

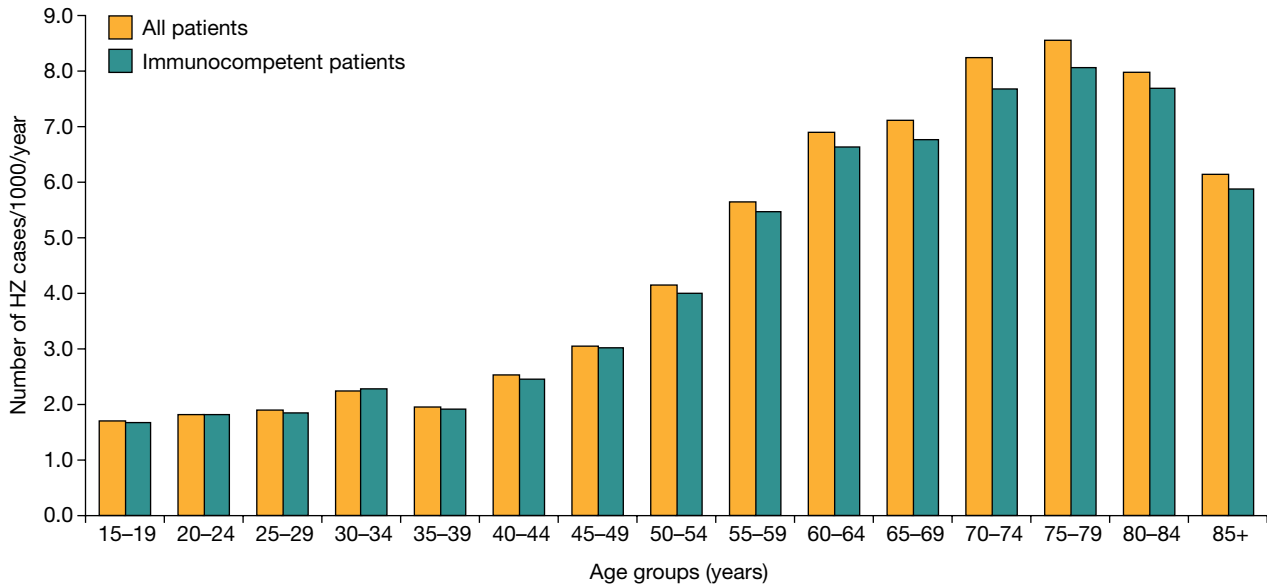

|                                                                                  |      |      |      |      |      |      |      |      |      |      |      |      |      |      |      |
|----------------------------------------------------------------------------------|------|------|------|------|------|------|------|------|------|------|------|------|------|------|------|
|  | 1.71 | 1.82 | 1.91 | 2.25 | 1.95 | 2.51 | 3.06 | 4.15 | 5.63 | 6.90 | 7.11 | 8.22 | 8.56 | 7.97 | 6.13 |
|  | 1.67 | 1.82 | 1.84 | 2.26 | 1.93 | 2.43 | 3.04 | 4.00 | 5.47 | 6.61 | 6.75 | 7.68 | 8.06 | 7.69 | 5.85 |

HZ = herpes zoster

Supplement: MOESM1 [file 9442096]
